# Supplementary material for: Urban sewershed overflow analysis using super-resolution weather radar rainfall
Source: Copernicus journal article supplement (doi:10.5194/hess-2016-362), 2016-08-30
Supplement: Supplementary file [file hess-2016-362-AC2-supplement.pdf]

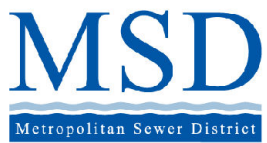

Louisville-Jefferson County  
Metropolitan Sewer District

# CSO130

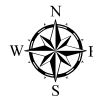

Map Data Source: LOJIC

\*Maps not to scale.

Report as of: 1/14/2014

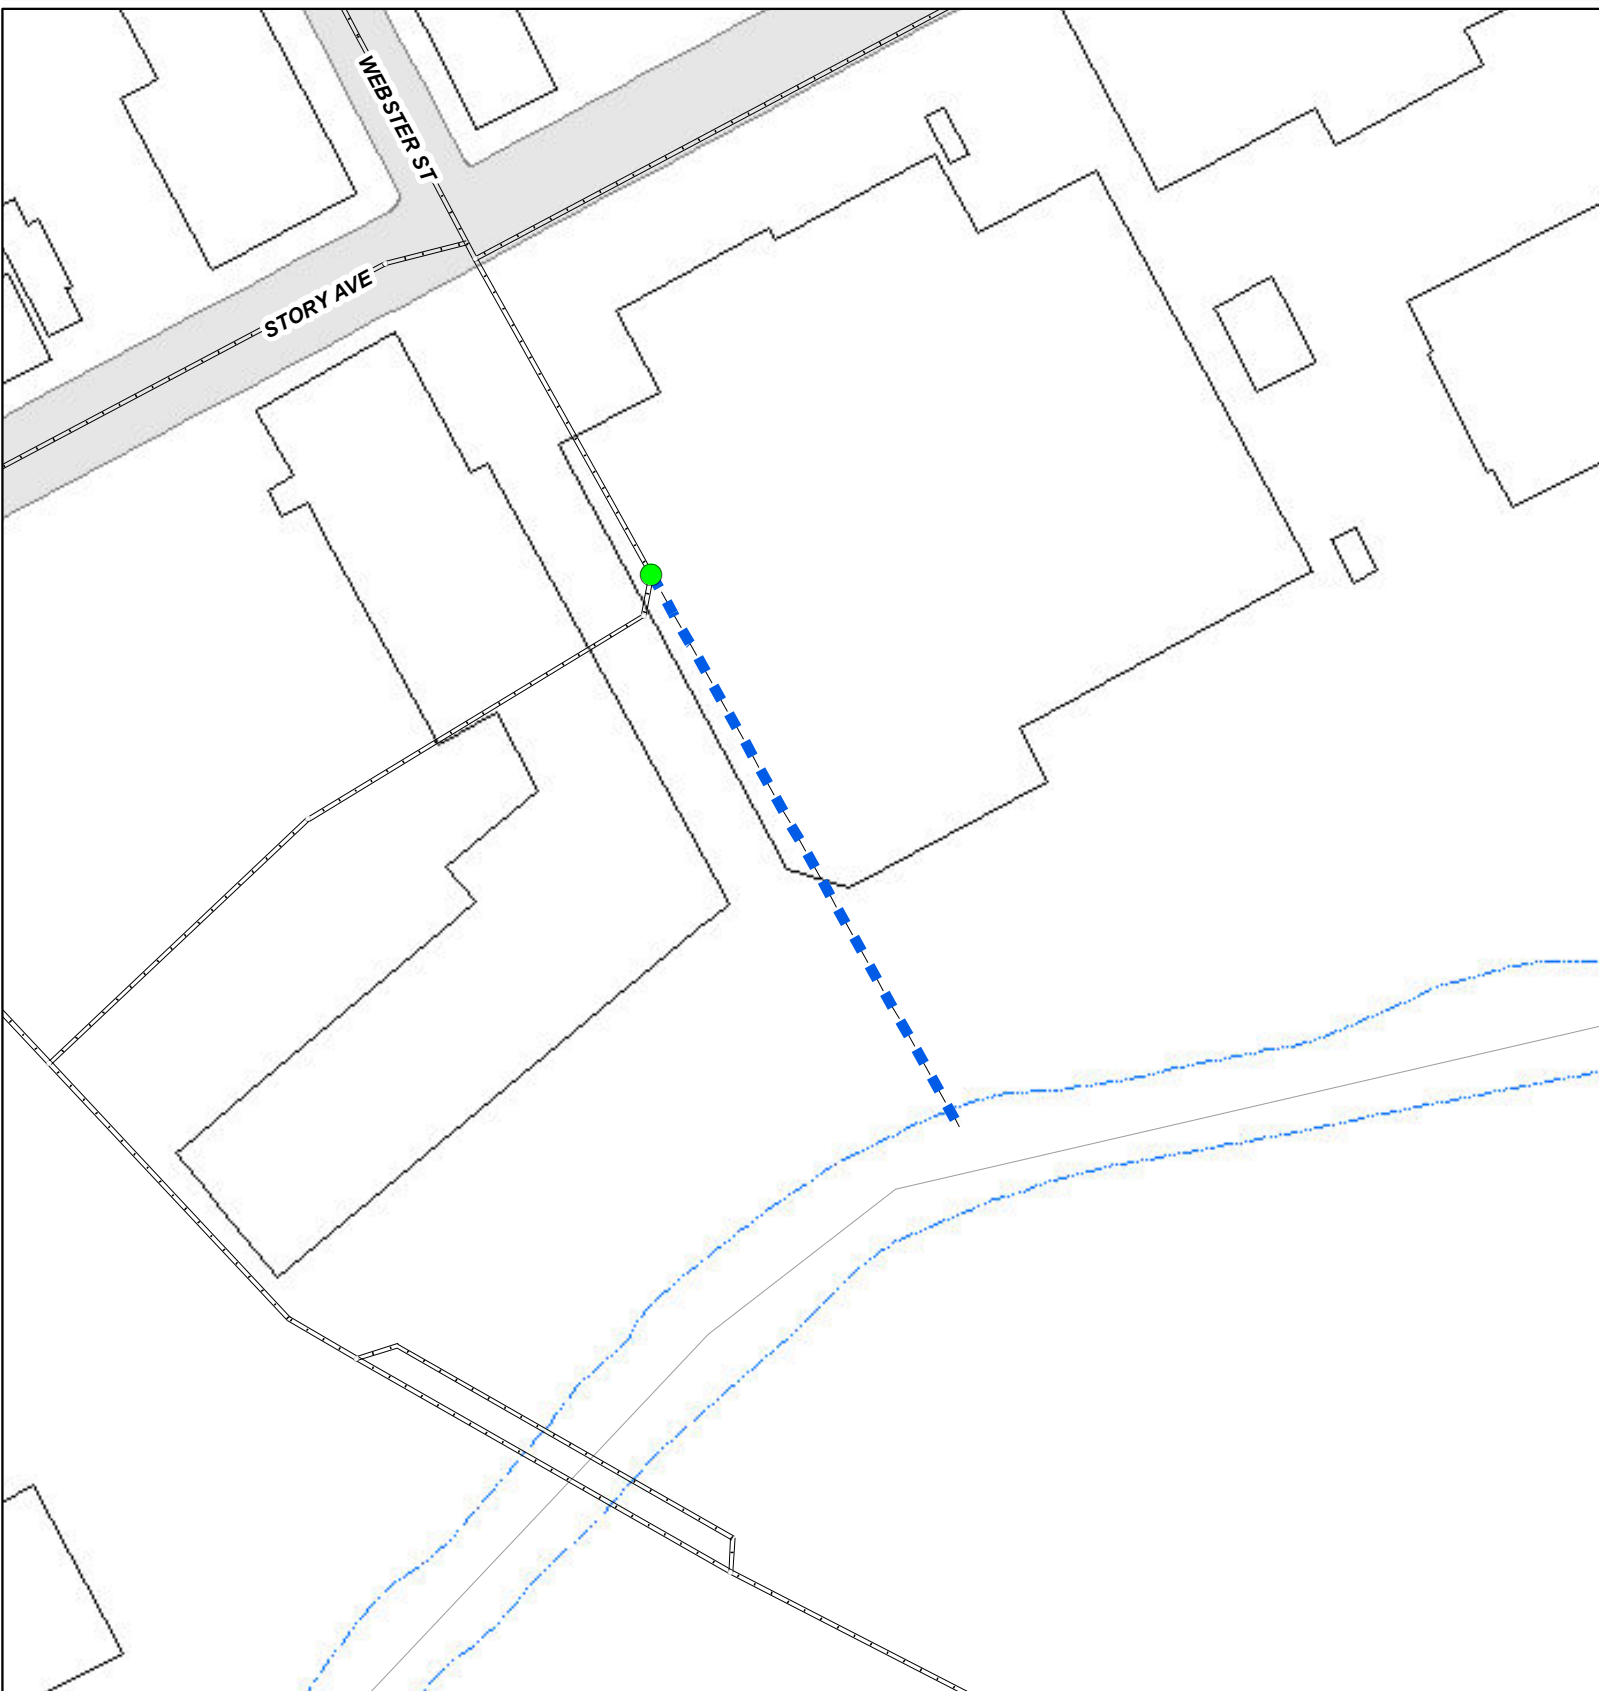

● CSO Location

□ Buildings

▲ Pump Station

▬ Combined Sewer Lines

▬ Overflow Lines

▬ Edge of Pavement

○ Manholes

▬ SewerLines

▬ Drainage Lines



**MSD**

Metropolitan Sewer District

Louisville-Jefferson County  
Metropolitan Sewer District

**CSO130**

Map Data Source: LOJIC      \*Maps not to scale.



Report as of: 1/14/2014

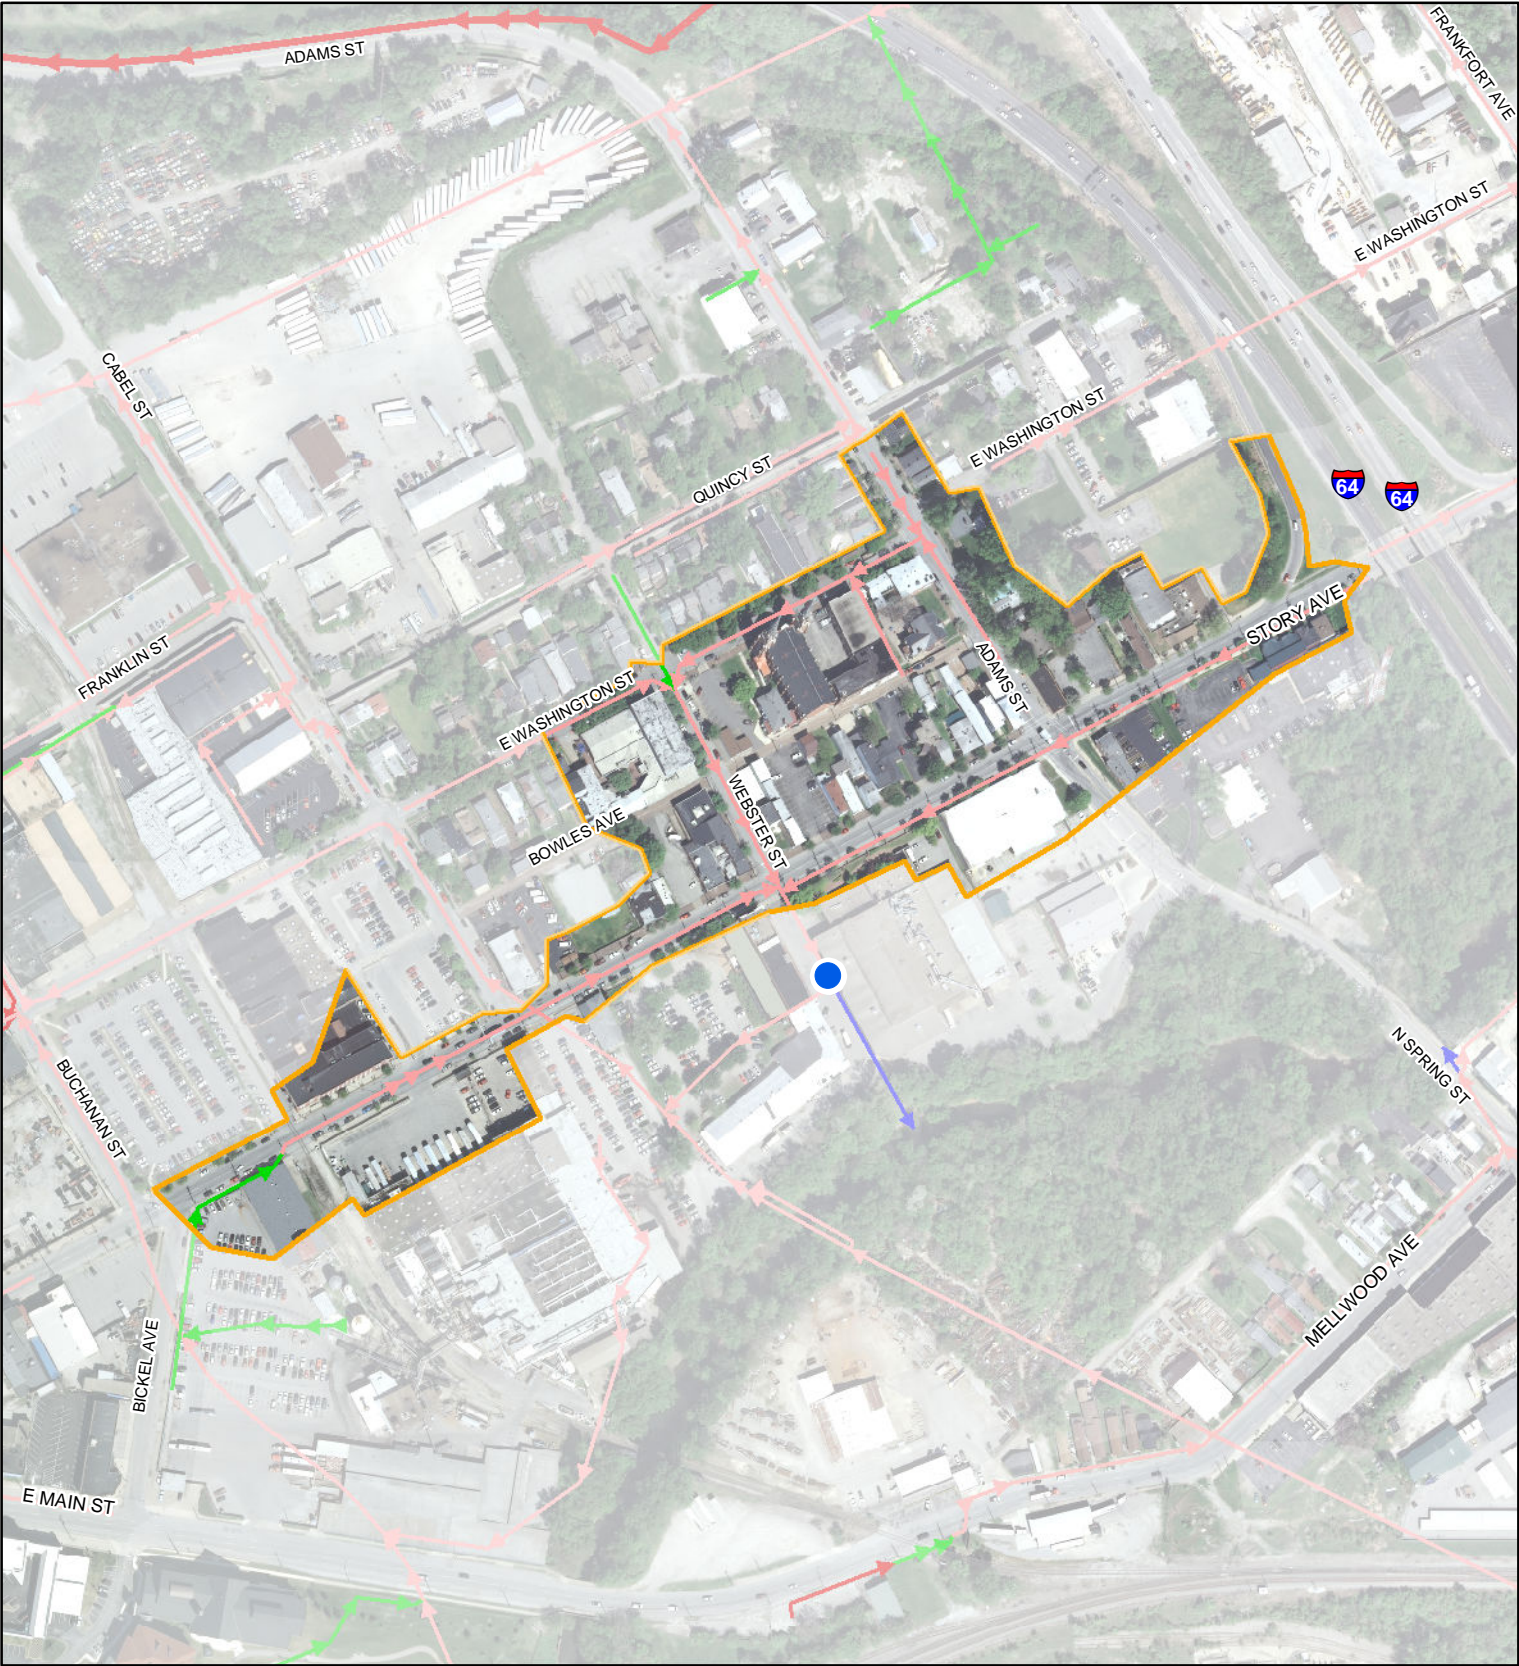

-  CSO In Service

 CSO Boundary

 Combined

 Siphons

 Sanitary

 TP Effluent Lines
-  Force Mains

 Overflows

 Trunk/Interceptors

 Air Release Lines



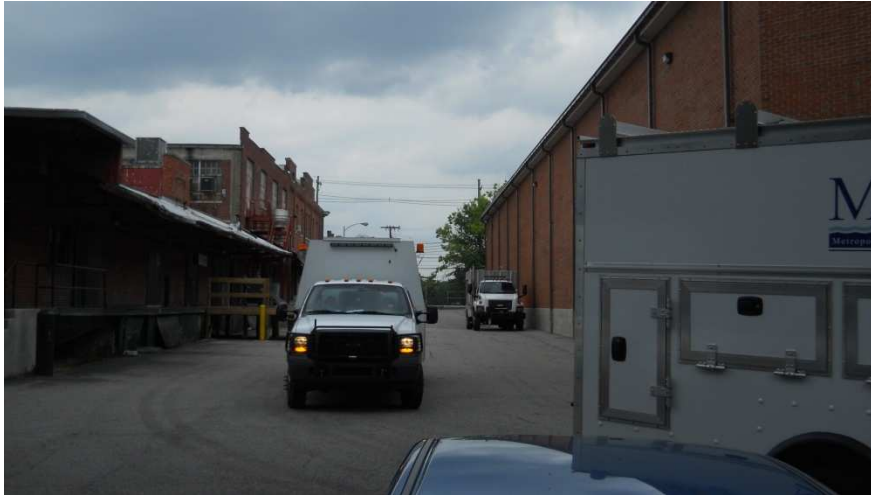

**Fig 1:** The vehicles are parked in the parking lot between J. Gumbo's and the Medical Center Laundry

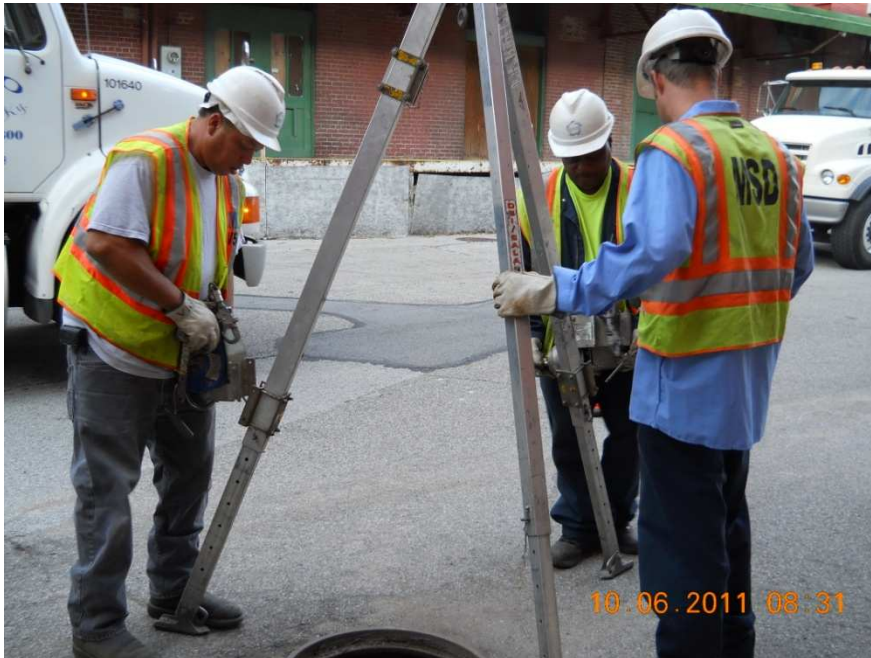

**Fig 2:** There are a lot of commercial vehicles around the job site.

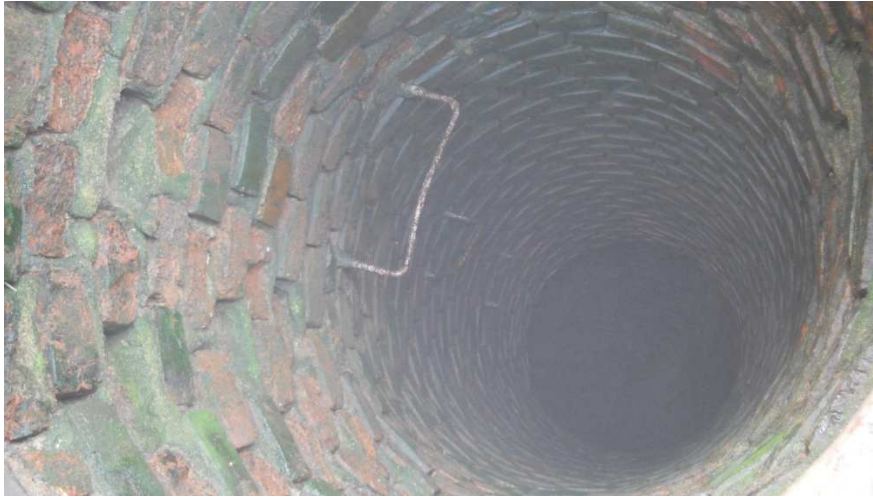

**Fig 3:** The rungs have been corroded away although some still are present and could be harmful to entrants

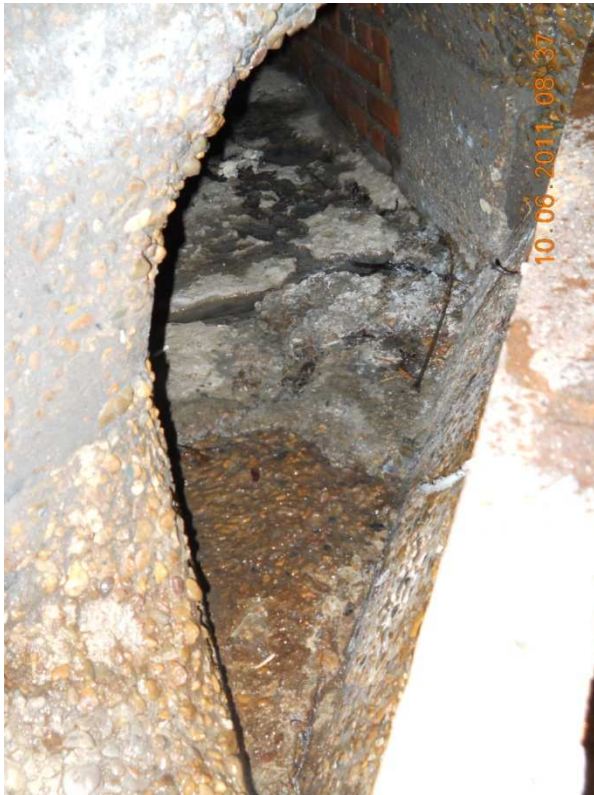

**Fig 4:** The over flow line is in good condition

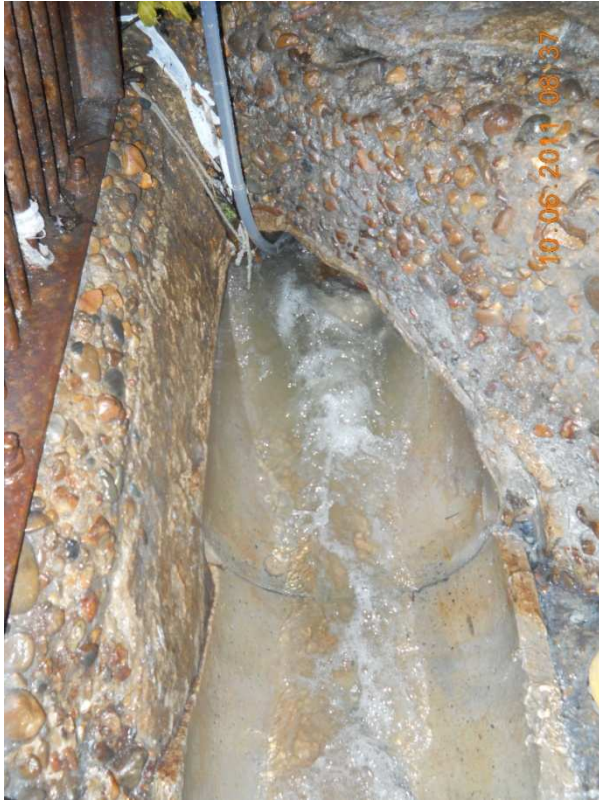

**Fig 5:** The downstream low flow line is in good condition



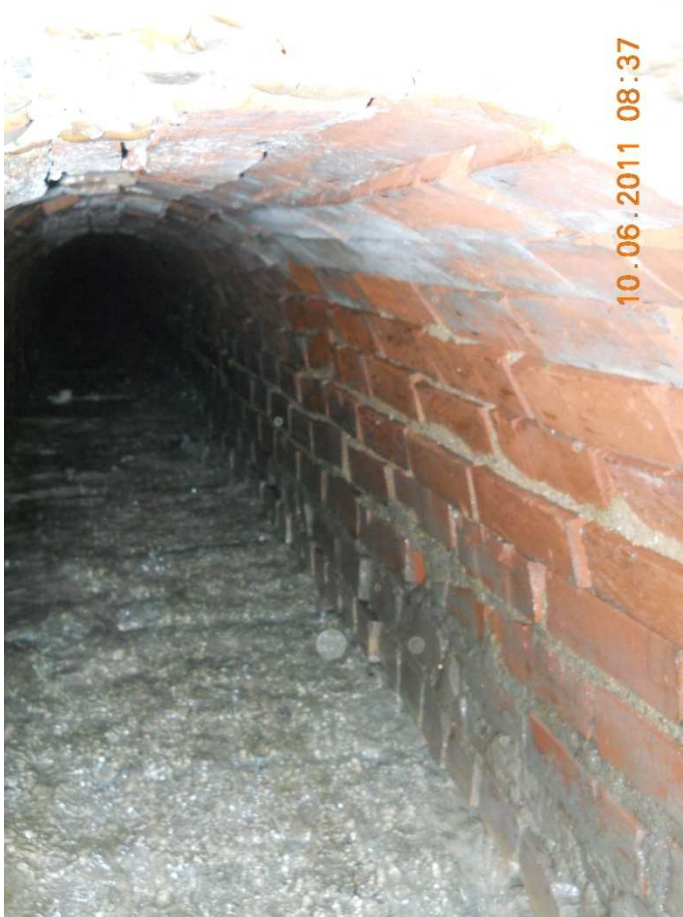

**Fig 6:** The upstream low flow line is in good condition. Most of the influent waste water is clear

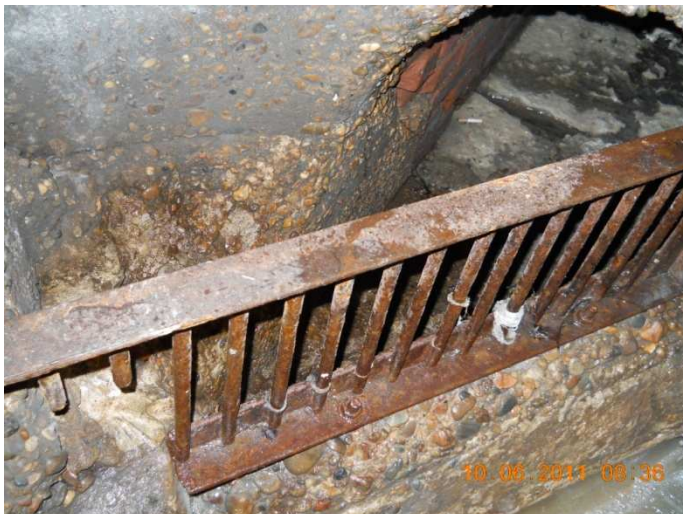

**Fig 7:** The bar screen is showing signs of rust but no major affects to its structural integrity.

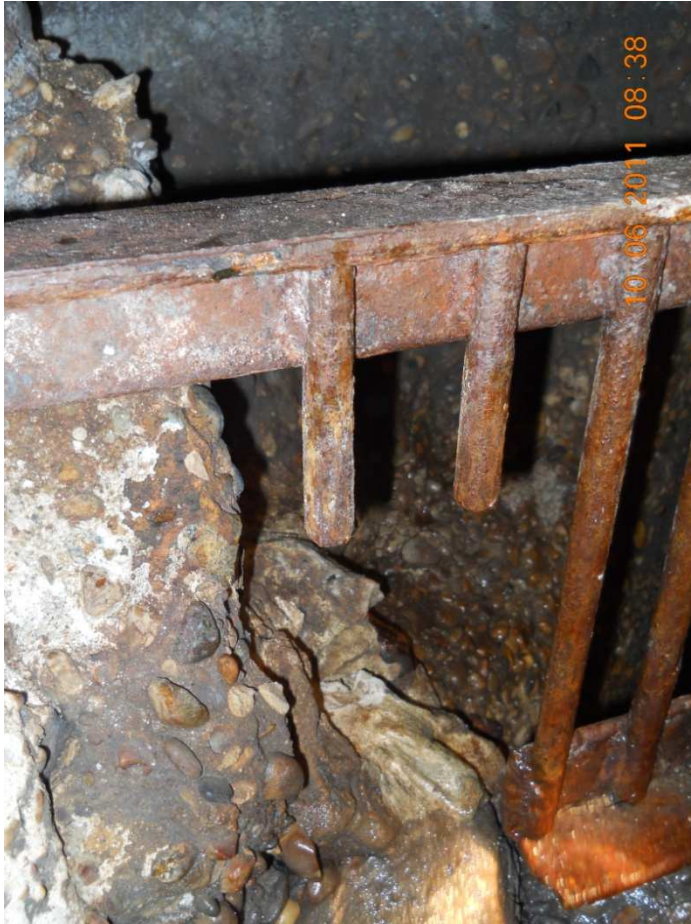

**Fig 8:** There is a space in the bar screen where debris could go through.

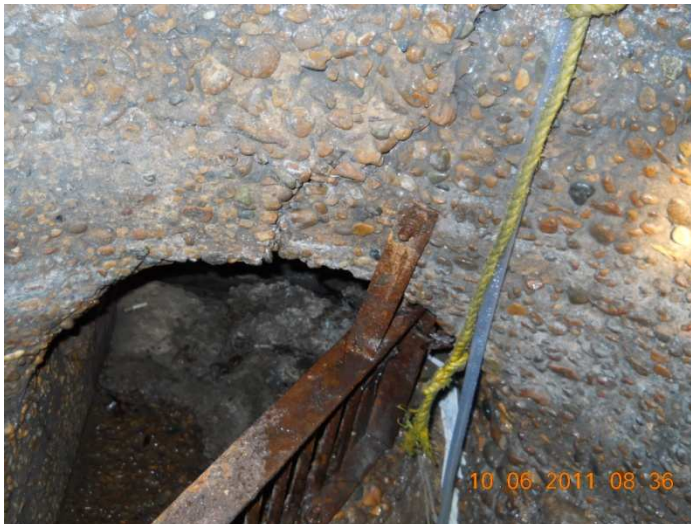

**Fig 9:** The bar screen is mounted securely over the dam.



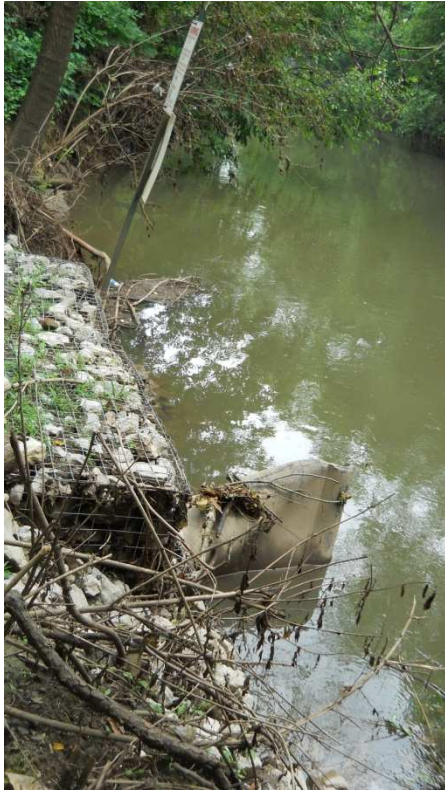

**Fig 10:** The tide flex valve is shut. There is no S & F near the site

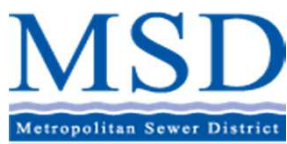

## CSO Characteristics Report

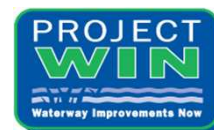

### CSO Number:

**CSO 130**

|                               |                            |
|-------------------------------|----------------------------|
| CSO Name:                     | Webster Street             |
| Overflow Type:                | Diversion Dam              |
| Solids and Floatables Device: | Screens                    |
| Drainage Area:                | 16                         |
| LOJIC Percent Impervious:     | 79%                        |
| Modeled Percent Impervious:   | 71%                        |
| Receiving Stream:             | Beargrass Creek            |
| General Location:             | South Fork Beargrass Creek |

---

|                                                 |      |
|-------------------------------------------------|------|
| Baseline AAOV (in MG/YR):                       | 1.08 |
| Number of Overflow Incidents (in Number/YR):    | 12   |
| Average Duration of Overflow (in Hours):        | 2.33 |
| Average Volume per Incident (in MGal/Incident): | 0.09 |

---

|                                                   |       |
|---------------------------------------------------|-------|
| LTCP 2014 AAOV (in MG/YR):                        | 0.06  |
| Number of Overflow Incidents (in Number/YR):      | 2     |
| Average Duration of Overflow (in Hours):          | 1.333 |
| Average Volume per Incident (in 1000 G/Incident): | 0.03  |

---

|                      |     |
|----------------------|-----|
| Residential Landuse: | 24% |
| Commercial Landuse:  | 25% |
| Industrial Landuse:  | 32% |
| Parks:               | 0%  |
| Vacant Landuse:      | 6%  |
| Population Estimate: | 118 |

---

Results are based on models populated in December 2013 utilizing InfoWorks ICM Version 3.0. Models were populated with LOJIC data and supplemented with field survey data. CSO's listed having 0.0 Drainage Areas typically serve as system relief points. While a CSO may display 0.0 AAOV, note that this is based on typical year rainfall data.



DATE: JUNE 4, 1991

CSO SERIAL NO. 130

REGULATOR NO. 31 - WEBSTER STREET SEWER

LOCATION: In parking lot south of Story Avenue opposite Webster Street

OVERFLOW TYPE: DAM

STRUCTURE OVERFLOW ELEVATION:

426.70 - Crest of dam

#### OVERFLOW TYPE AND SEWER GEOMETRY:

The overflow structure is an abandoned regulator located on a 24" circular brick sewer flowing southeast on Webster Street. A dam with a crest elevation of 426.70 diverts low flows through a 12" sewer at invert elevation 425.30 to the abandoned regulator chamber and exits through an 18" sewer to the 60" Middle Fork Trunk Relief Sewer. Overflows top the dam and continue through the 24" brick sewer to a 27" concrete sewer to Beargrass Creek. The invert elevation of the 12" sewer at the abandoned regulator chamber is 424.60. The invert elevation of the 18" outlet sewer is 423.16. The 18" sewer enters the Middle Fork Trunk Relief Sewer at invert elevation 419.35. The invert elevation of the Middle Fork Trunk Relief at this point is 417.60.

#### BACKWATER LENGTHS AND STORAGE VOLUMES:

The backwater length is about 70 feet. The storage volume is about 80 cubic feet.

#### DOWNSTREAM BACKWATER EFFECTS:

The overflow discharges to Beargrass Creek. The elevation of Beargrass Creek at the discharge point is about 420.00. High levels in the creek can backflow into the overflow pipe.

\*NOTE: Regulator removed in 2007

Updated

12/00

Updated

12/08 (Revised Elevation per Survey)

Solids and Floatables Technology: Screen

REVISED ELEVATIONS PER JACOBI,  
TOOMBS AND LANZ SURVEY, OCT. 2005  
- JULY 2006 (NGVD 29)

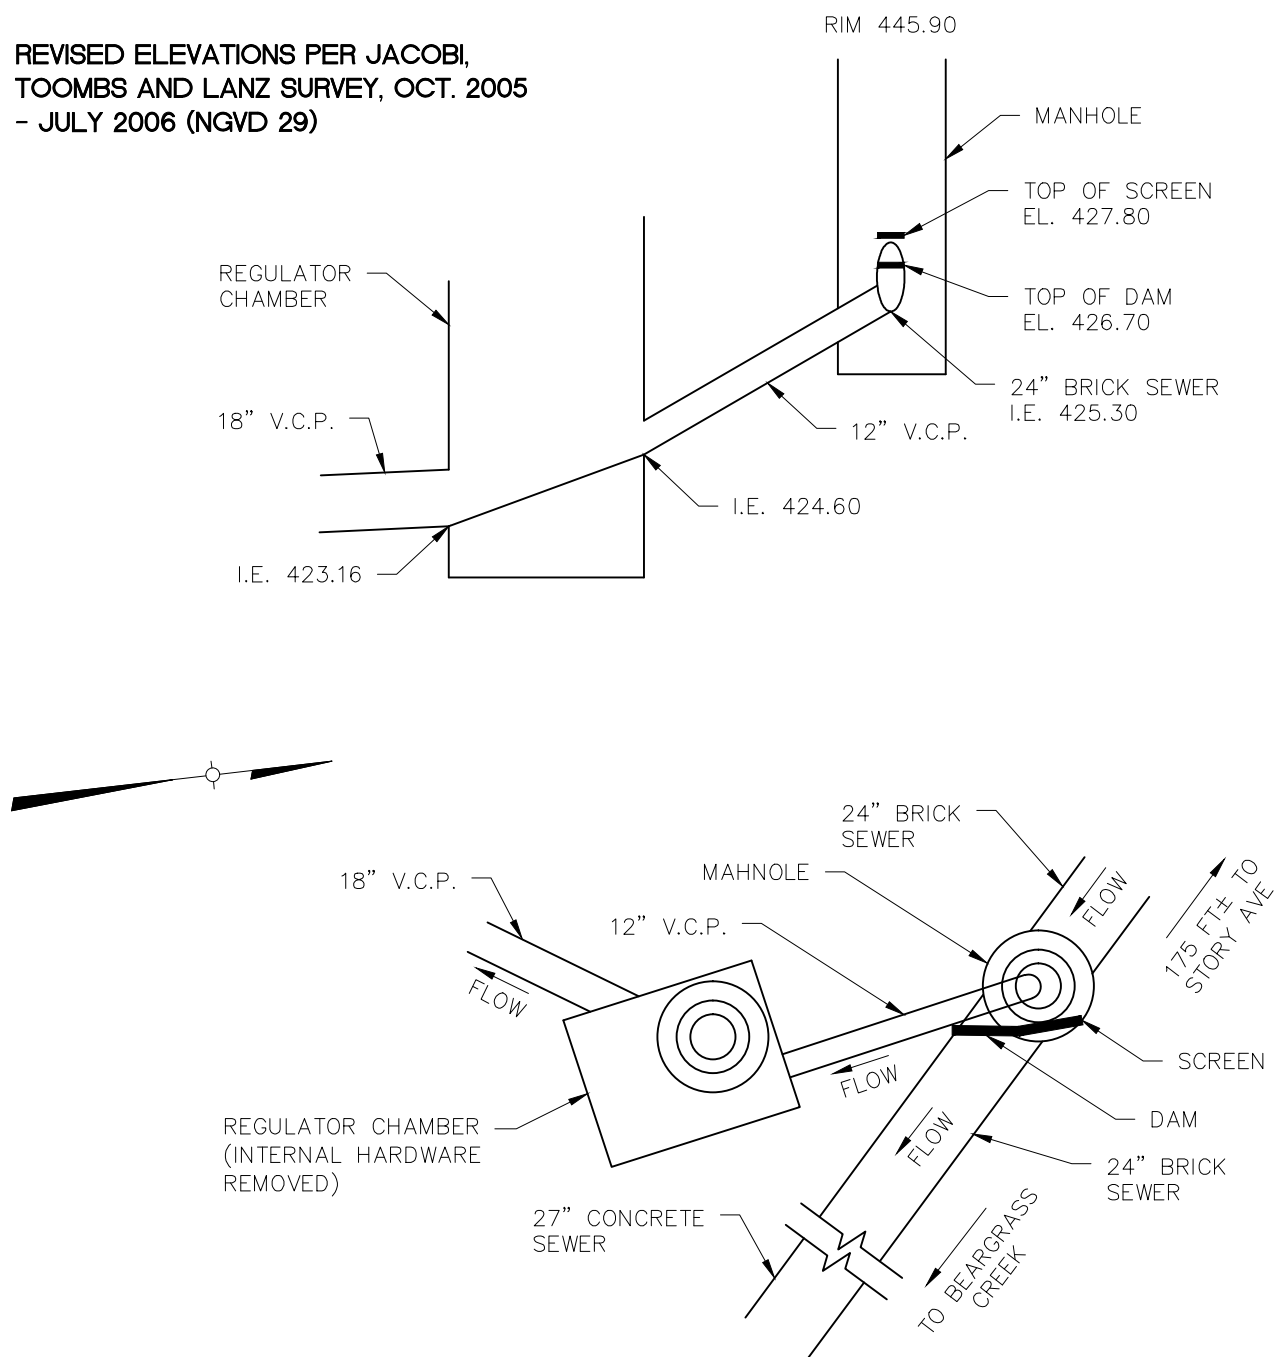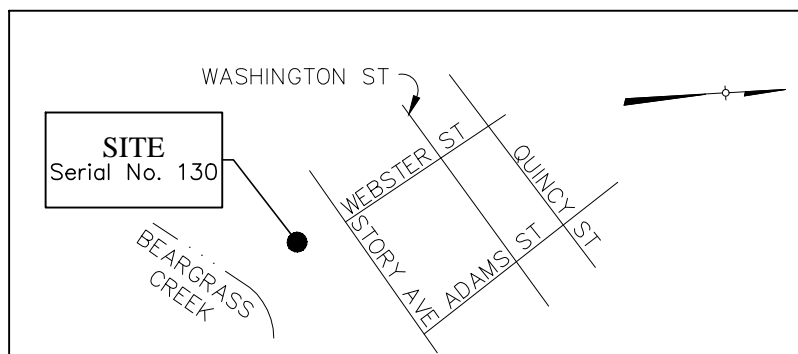

**LOCATION MAP**

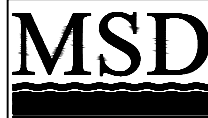

Louisville and Jefferson County  
Metropolitan Sewer District  
700 W. Liberty Street  
Louisville, Kentucky 40203-1913  
502-587-0603 - WWW.MSDLOUKY.ORG

**REGULATOR No. 31**

**WEBSTER STREET SEWER**

**OVERFLOW TYPE: DAM**

**SERIAL No. 130**

| Date       |        |          | Scale  |      |
|------------|--------|----------|--------|------|
| Made By    | C.B.F. | 10-11-84 | Horiz. | NONE |
| Checked By | T.M.   | 1-16-90  | Vert.  | NONE |
